# Supplementary material for: The E3 ubiquitin ligase SMURF1 regulates cell-fate specification and outflow tract septation during mammalian heart development
Source: PubMed Central journal article supplement (PMC6015040; doi:10.1038/s41598-018-27854-8), 2018-06-22
Supplement: 41598_2018_27854_MOESM1_ESM.pdf [file 41598_2018_27854_MOESM1_ESM.pdf]

## Supplementary Information

### The E3 ubiquitin ligase SMURF1 regulates cell-fate specification and outflow tract septation during mammalian heart development

K Koefoed, J Skat-Rørdam, P Andersen, CB Warzecha, M Pye, TA Andersen, KD Ajbros, E Bendtsen, M Narimatsu, F Vilhardt, LB Pedersen, JL Wrana, RH Anderson, K Møllgård, ST Christensen and LA Larsen

Suppl. Figure 1

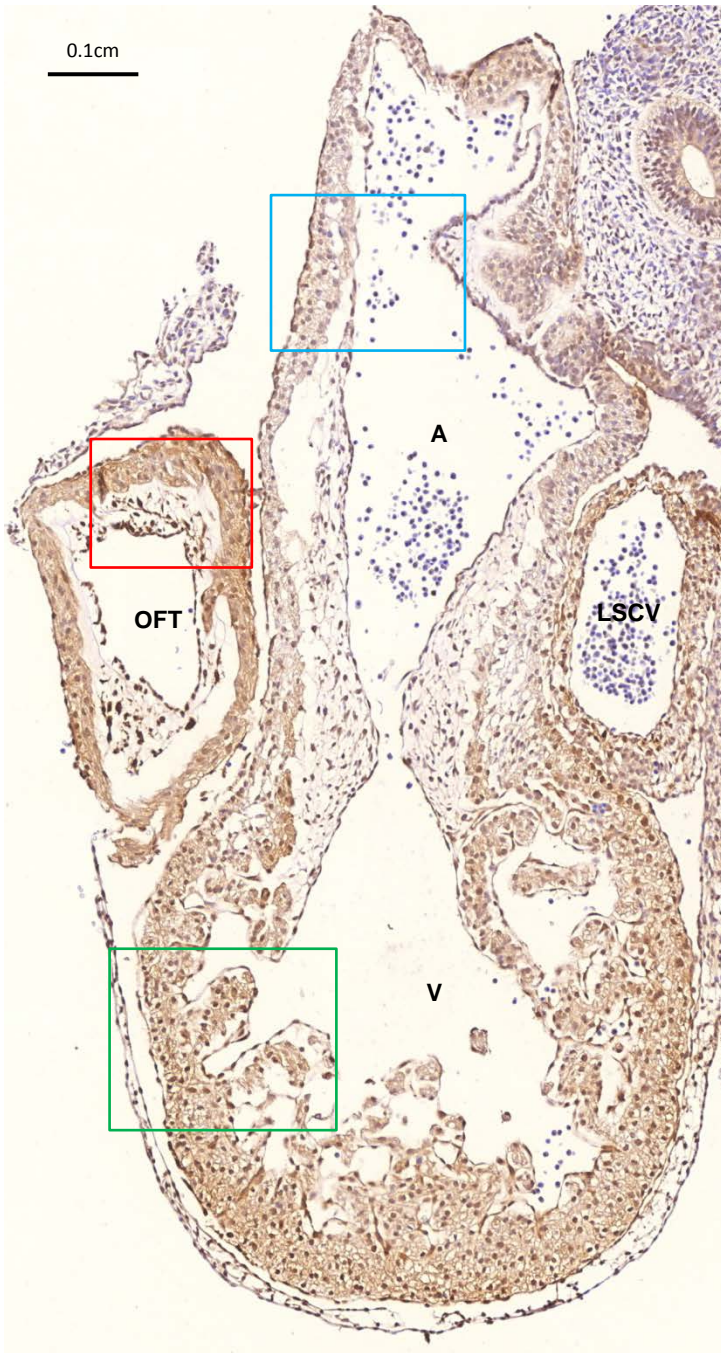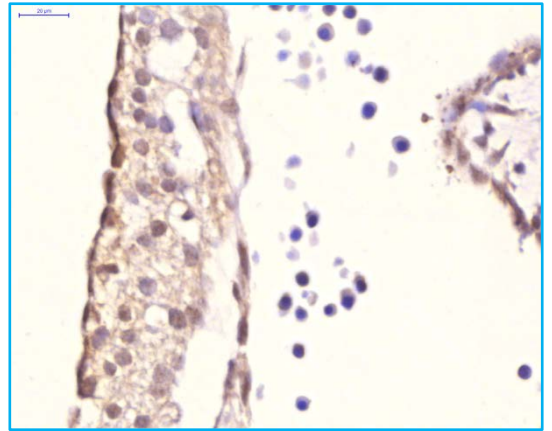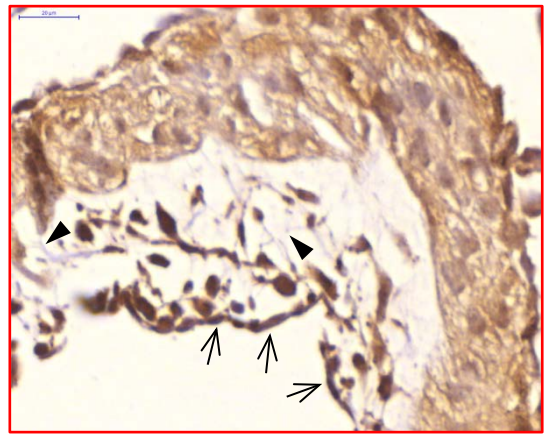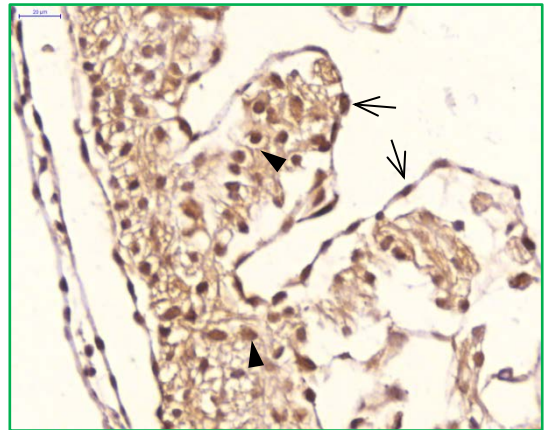



Suppl. Figure 2

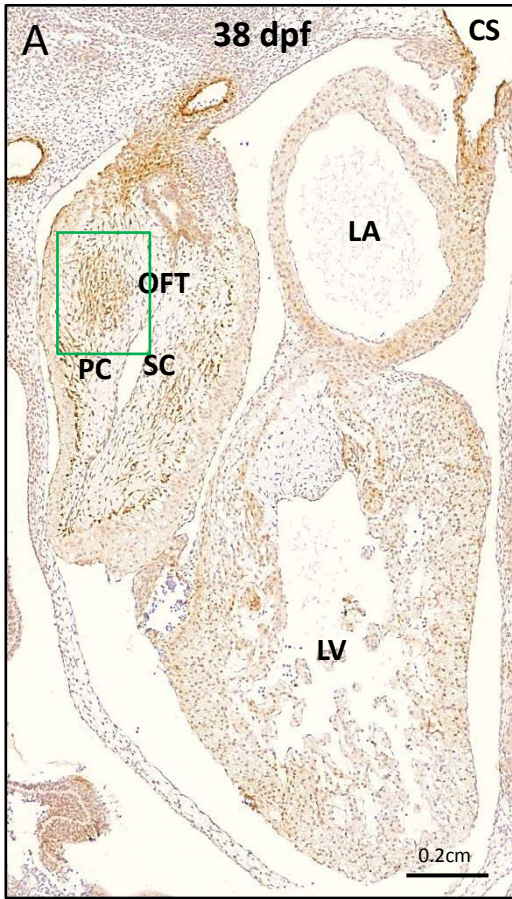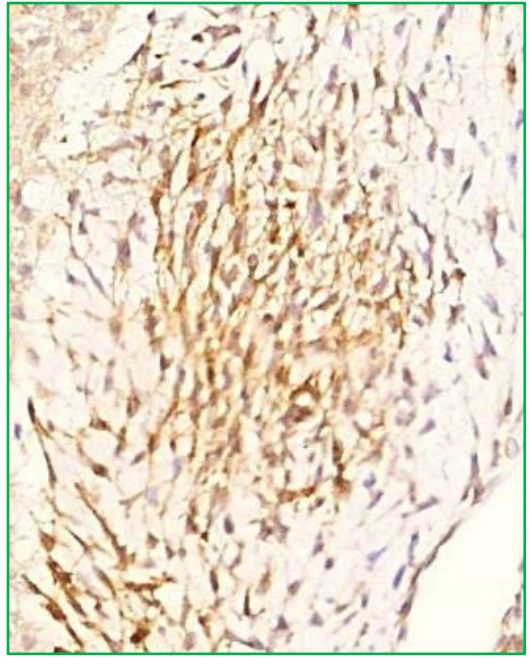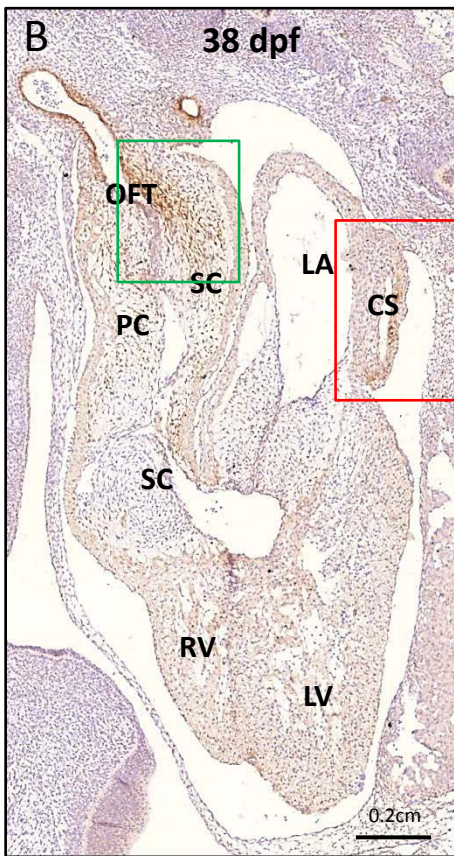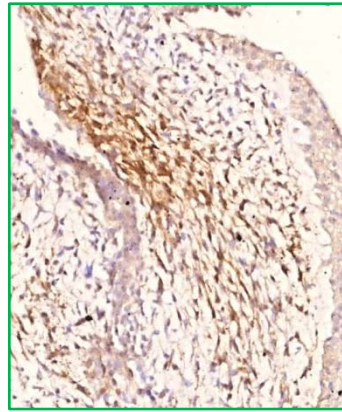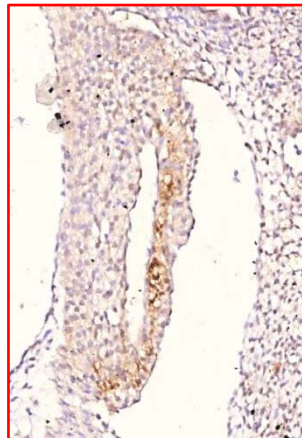

# Suppl. Figure 3

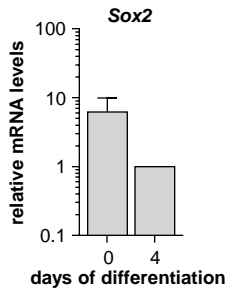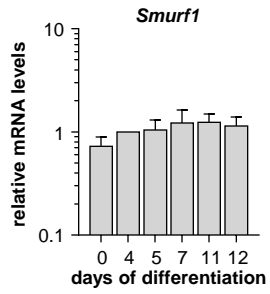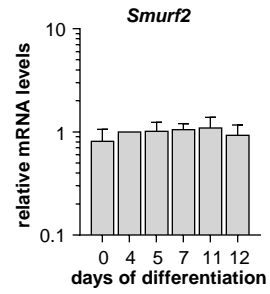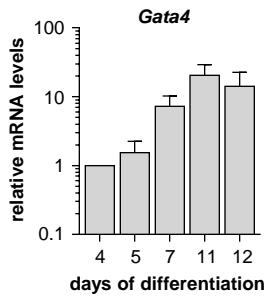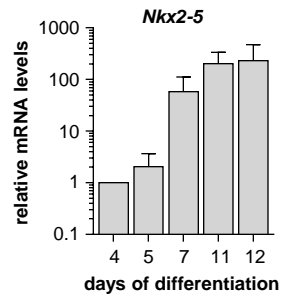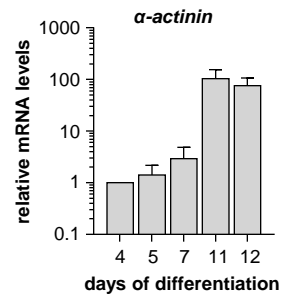

# Suppl. Figure 4

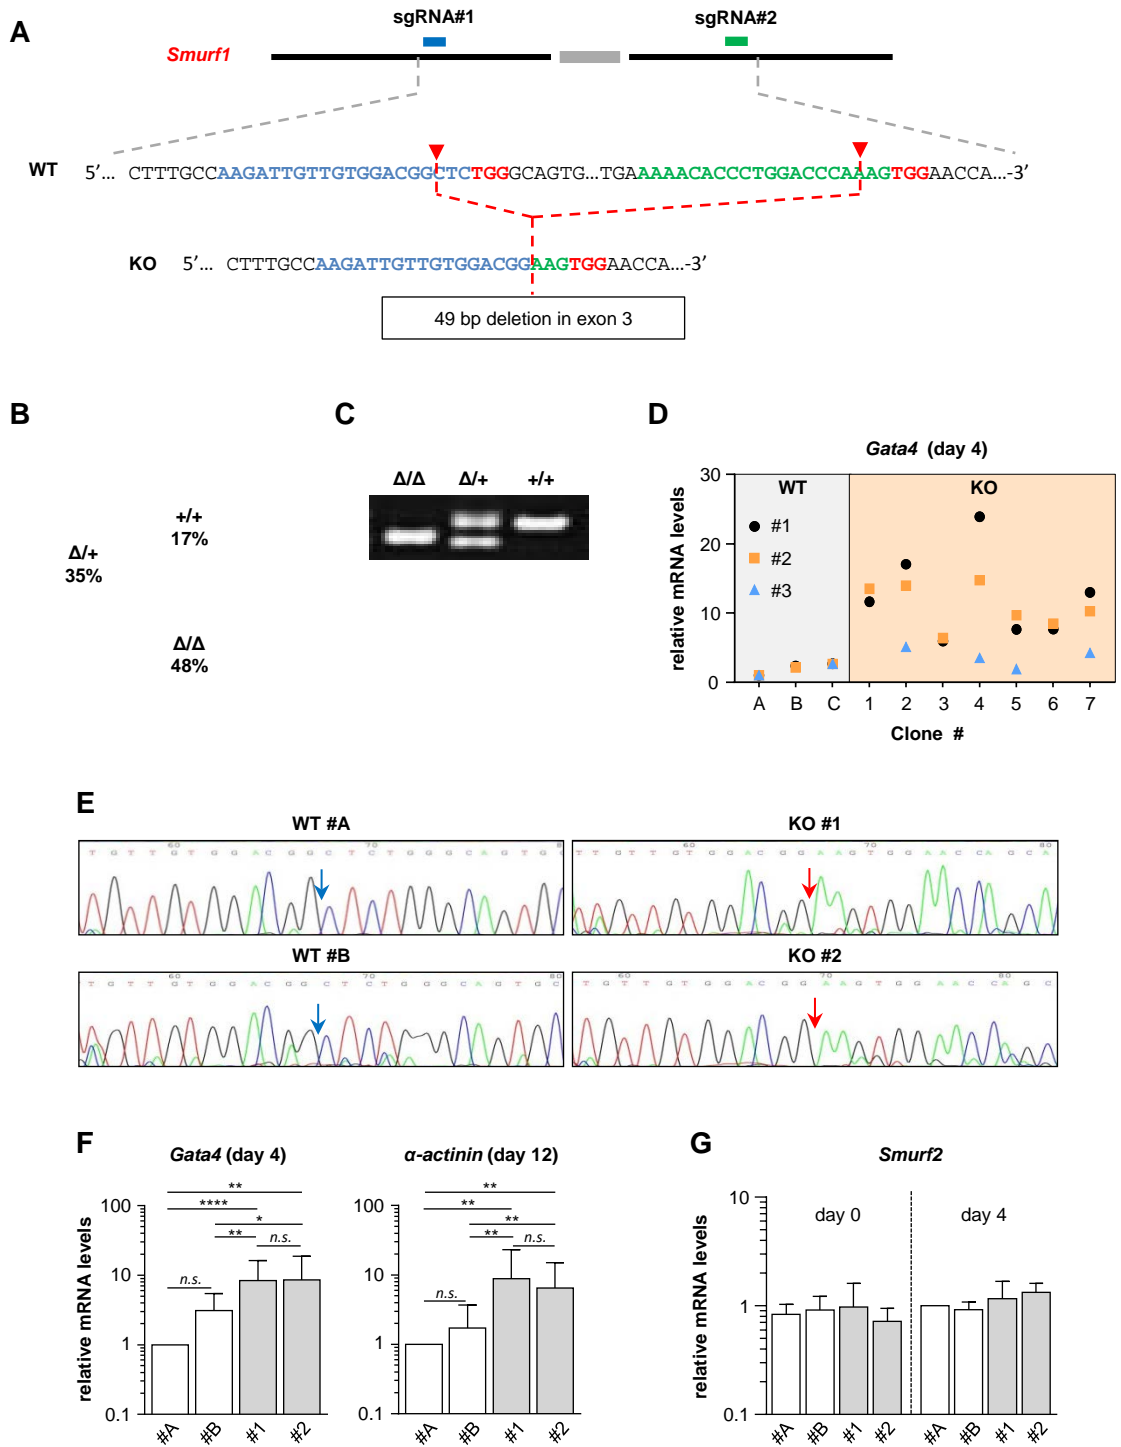

# Suppl. Figure 5

Western blot shown in figure 3A

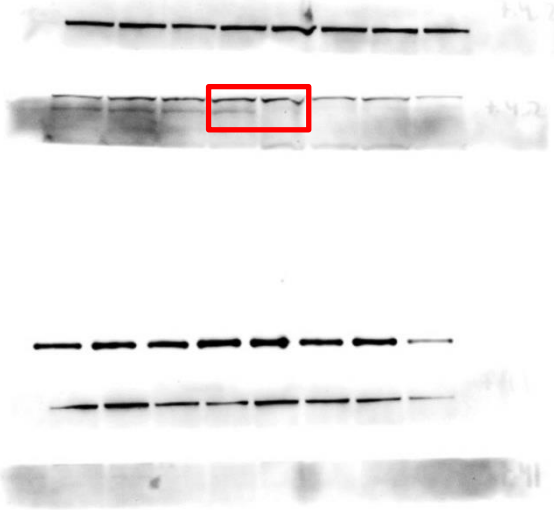

Western blot shown in figure 3D

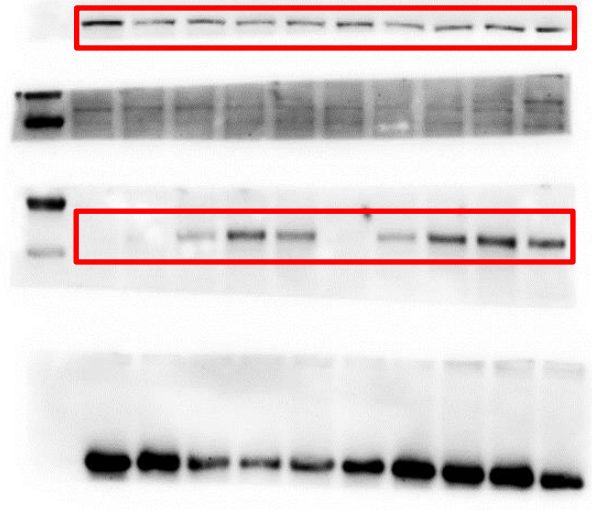

Western blots shown in figure 5A

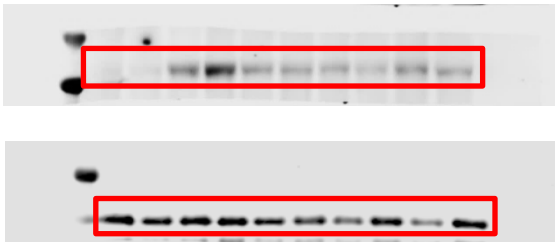

Western blots shown in figure 5B

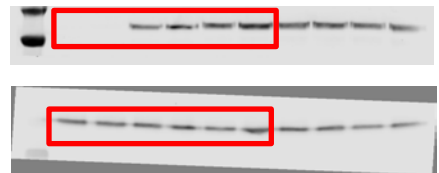

Western blots shown in figure 5C

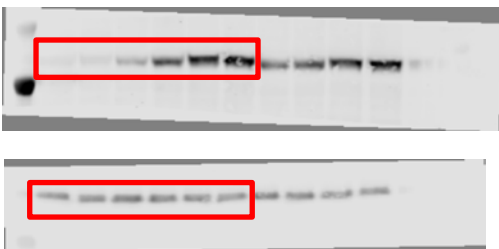

Western blots shown in figure 5F

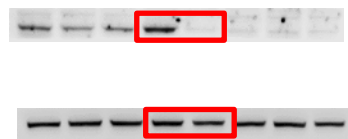



## Suppl. Figure 5 cont.

Agarose gel shown in figure 3A and 4S

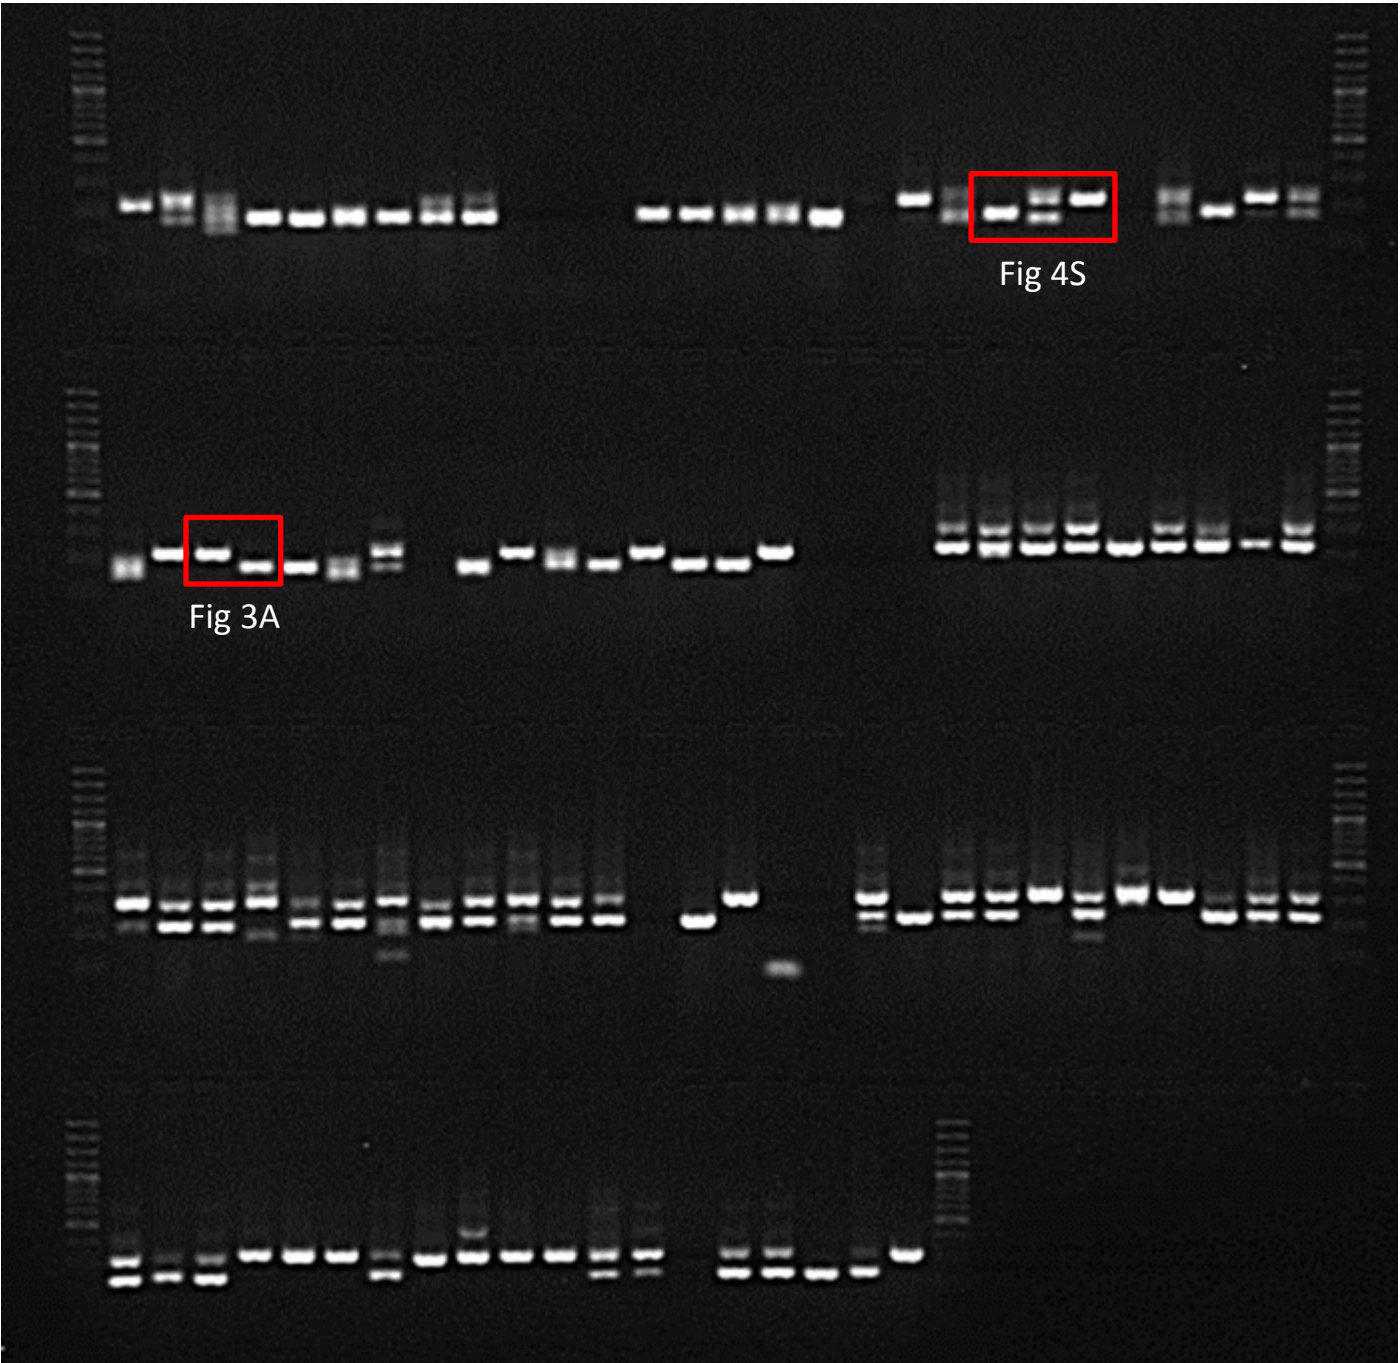

**Suppl. Table 1: Primary antibodies**

| Antigen                                         | abbreviation          | Company        | Catalog#    | Application       |
|-------------------------------------------------|-----------------------|----------------|-------------|-------------------|
| alpha-actinin                                   | $\alpha$ -ACTININ     | Sigma          | A7811       | FACS              |
| alpha smooth muscle actin                       | $\alpha$ -SMA         | Sigma          | A2547       | IHC               |
| acetylated $\alpha$ -tubulin                    | Ac-Tub                | Sigma          | T7451       | ICC               |
| ADP-ribosylation factor-like 13B                | ARL13B                | Protein tech   | 17711-1-AP  | IHC               |
| BMP receptor II                                 | BMPRII                | Santa cruz     | Sc-5682     | ICC               |
| BMP receptor I                                  | BMPRI                 | Santa cruz     | Sc-25454    | ICC               |
| GATA Binding Protein 4                          | GATA4                 | Santa cruz     | sc-1237     | IFM WB            |
| hypoxanthine-guanine phosphoribosyl transferase | HPRT                  | Protein tech   | 15059-1-AP  | WB                |
| mouse IgG1 negative control antibody            | IgG                   | Biorad         | MCA1209     | FACS              |
| p150 <sup>glued</sup>                           | p150 <sup>glued</sup> | BD-Biosciences | 610474      | WB                |
| phospho-SMAD1/5                                 | p-SMAD1/5             | Cell signaling | 9516S       | ICC, WB           |
| phospho-SMAD1/5                                 | p-SMAD1/5             | Santa cruz     | Sc-12353    | IHC               |
| SMURF1                                          | SMURF1                | Abcam          | Ab57573     | IHC, WB (P19.CL6) |
| SMURF1                                          | SMURF1                | Sigma          | WH005715aM1 | WB (RPE)          |
| SMURF1                                          | SMURF1                | Santa cruz     | Sc-25510    | ICC               |
| T-box transcription factor 2                    | TBX2                  | Abcam          | Ab33298     | IHC               |

**Suppl. Table 2: 60-mer oligonucleotides containing Smurf1 sgRNA#1 and sgRNA#2**

| Name     | Species | Oligonucleotide 5'→3'                                         |
|----------|---------|---------------------------------------------------------------|
| sgRNA#1F | Mouse   | TTTCTTGGCTTTATATATCTTGTGGAAAGGACGAAACACCGAGATTGTTGTGGACGGCTC  |
| sgRNA#1R | Mouse   | GACTAGCCTTATTTAACTTGCTATTTCTAGCTCTAAAACGAGCCGTCCACAACAATCTC   |
| sgRNA#2F | Mouse   | TTTCTTGGCTTTATATATCTTGTGGAAAGGACGAAACACCGAAACACCCCTGGACCCAAAG |
| sgRNA#2R | Mouse   | GACTAGCCTTATTTAACTTGCTATTTCTAGCTCTAAAACCTTTGGGTCCAGGGTGTTC    |

**Suppl. Table 3: Primers**

| Gene                                             | Annealing temp. (°C) | Forward primer            | Reverse primer            |
|--------------------------------------------------|----------------------|---------------------------|---------------------------|
| <b>Primers used for qRT-PCR in P19.CL6 cells</b> |                      |                           |                           |
| <i><math>\alpha</math>-Actinin</i>               | 60°                  | CTGGAGTTTGCCAAGAGAGC      | AACAGTGCTGTAGGGGTTGC      |
| <i>Gapdh</i>                                     | 60°                  | AACAGCAACTCCCACTCTTC      | TGGTCCAGGGTTTCTTACTC      |
| <i>Gata4</i>                                     | 60°                  | CCTCCAGCGGTAACCTCC        | CTGATTACGCGGTGATTATG      |
| <i>Nkx2.5</i>                                    | 60°                  | CAAGTGCTCTCCTGCTTTCC      | GTACCGCTGTTGCTTGAAGC      |
| <i>Psm4</i>                                      | 60°                  | GCAAGATGGTGTGGAGAGC       | TTTGGGTTGGACAGTGTGG       |
| <i>Smurf1</i>                                    | 60°                  | AGGCTCTGCAAGGCTCTACAG     | GGTGGTTGTGAGCAAGACTCTG    |
| <i>Smurf2</i>                                    | 50°                  | AAGAACTACACAGTGGGAACGC    | CACGTTGCACCATTTGTTC       |
| <i>Sox2</i>                                      | 60°                  | GGCAGTACAGCATGATGCAGGAGC  | CTGGTCATGGAGTTGTACTGCAGG  |
| <b>Primers for qRT-PCR in human hearts</b>       |                      |                           |                           |
| <i>ATP6</i>                                      | 60°                  | CTGAATGCTCCACTTTTTCAATTCT | CGACAGCGATTTCTAGGATAGTCAG |
| <i>COX4</i>                                      | 60°                  | TGAGATGAACAGGGGCTCGAAC    | TTCGTAGTCCCACTTGGAGGCTAAG |
| <i>GAPDH</i>                                     | 60°                  | GGAAGGTGAAGTCCGAGTCAA     | GATCTCGTCTCTGGAAGATGGT    |
| <i>SMURF1</i>                                    | 60°                  | AGCATGAACTGAAACCAATGG     | GCTCATTGAACCCCTTCTGC      |
| <b>Primers used for genotyping</b>               |                      |                           |                           |
| <i>Smurf1</i>                                    | 60°                  | GCTGTGCCACCAGGTAGACT      | GCCTGACGCCACTTTTCC        |



## Supplemental Figure legends

### Suppl. Figure 1: Expression of SMURF1 in the 35 dpf heart

IHC staining of SMURF1 in human heart section from 35 dpf. Blue box shows SMURF1 expression in atrial myocardium, red box shows SMURF1 expression in the OFT. Arrow heads mark endocardial cells, open arrows mark mesenchymal cells. Green box shows SMURF1 expression in the ventricle. Abbreviations: A: Atrium, LSCV: Left superior caval vein, OFT: Outflow tract, V: Ventricle.

### Suppl. Figure 2: Expression of SMURF1 in the 38 dpf heart

**A:** IHC staining of SMURF1 in human heart section from 38 dpf. **B:** IHC staining of SMURF1 in a neighboring section to A. Abbreviations: CS: coronary sinus, LA: Left atrium, LV: Left ventricle, OFT: Outflow tract, PC: Parietal cushion, RV: Right ventricle, SC: septal cushion.

### Suppl. Figure 3: Differentiation of P19.CL6 cells

Quantitative RT-PCR analysis of the relative expression of *Sox2*, *Gata4*, *Nkx2-5*,  $\alpha$ -actinin, *Smurf1* and *Smurf2* during differentiation of WT P19.CL6 cells. Data are normalized to *Gapdh* and *Psm4*, n=8.

### Suppl. Figure 4: Validation of CRISPR clones

**A:** Schematic illustration of generation of *Smurf1* KO clones. The two sgRNAs (sgRNA#1 and sgRNA#2) were designed to target exon three in the *Smurf1* gene. The Cas9 cuts (red arrow) a fragment of 49bp in *Smurf1* that was predicted to produce a premature stop codon and a truncated gene product (sgRNA#1, blue; sgRNA#2, green). **B:** Pie-chart showing the distribution of WT heterozygous and KO clones.  $\Delta/\Delta$ : knockout,  $\Delta/+$ : heterozygous,  $+/+$ : WT. **C:** Agarose gel of the PCR product following CRISPR-Cas9 treatment. **D:** qRT-PCR analysis *Gata4* mRNA expression on day 4 of differentiation of three WT clones #A-C and seven KO clones #1-7. Data is normalized to *Gapdh* and *Psm4*. Three different experiments are plotted (#1-3). **E:** Results from Sanger sequencing of two WT (#A and #B) and two knockout clones (#1 and #2). Blue arrow: no Cas9 activity and WT sequence, red arrow: Cas9 activity and 49bp deletion. **F:** qRT-PCR analysis of two WT and two KO clones. The relative mRNA levels of *Gata4* and  $\alpha$ -actinin after 4 and 12 days of DMSO stimulation, respectively, were analyzed. Data are normalized to *Gapdh* and *Psm4*. Ratio-paired t-test was used for statistical analysis \* $p < 0.05$  \*\* $p < 0.01$  \*\*\*\* $p < 0.0001$ , n=10 for *Gata4* and n=8 for  $\alpha$ -actinin. **G:** qRT-PCR analysis of two WT and two KO clones. The relative mRNA levels of *Smurf2* on days 0 and 4 of DMSO stimulation were analyzed. Data are normalized to *Gapdh* and *Psm4*. Original picture of the agarose gel is shown in supplemental figure 5.

### Suppl. Figure 5: Original pictures of western blots and agarose gels

The pictures taken of the original blots and gels before cropping of the pictures is shown. The part of the pictures used in figure 3, 5 and S4 is marked with red box.
